# Supplementary material for: Identification of enzymes involved in SUMOylation in Trypanosoma brucei
Source: PubMed Central journal article supplement (PMC4426598; doi:10.1038/srep10097), 2015-05-11
Supplement: srep10097-s1.pdf [file srep10097-s1.pdf]

# Supplementary Information

## Identification of enzymes involved in SUMOylation in *Trypanosoma brucei*

KaiqinYe<sup>1</sup>, Xuecheng Zhang<sup>2,3</sup>, Jun Ni<sup>1</sup>, Shanhui Liao<sup>1,\*</sup> and  
Xiaoming Tu<sup>1,\*</sup>

<sup>1</sup> Hefei National Laboratory for Physical Sciences at Microscale, School of Life Sciences, University of Science and Technology of China, Hefei, Anhui 230026, P.R. China

<sup>2</sup> School of Life Sciences, Anhui University, Hefei, Anhui 230039, P.R. China

<sup>3</sup> Anhui Provincial Engineering Technology Research Center of Microorganisms and Biocatalysis, 111 Jiulong Road, Hefei, Anhui 230601, P.R. China

\*Correspondence to: Shanhui Liao, E-mail: [ajsod@mail.ustc.edu.cn](mailto:ajsod@mail.ustc.edu.cn), and Xiaoming Tu, E-mail: [xmtu@ustc.edu.cn](mailto:xmtu@ustc.edu.cn)

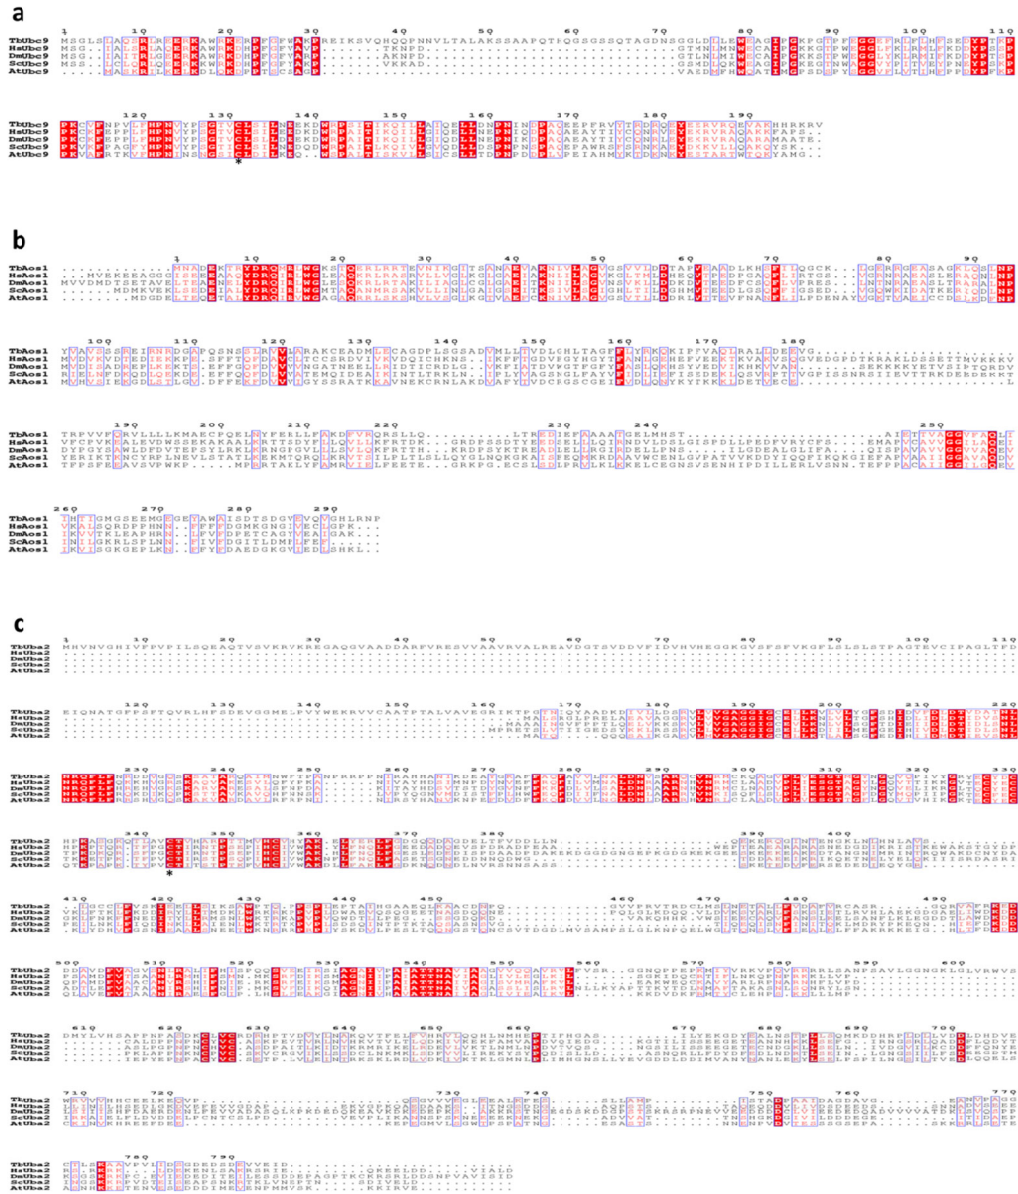

**Figure S1:** Sequence alignment of Ubc9 (a), Aos1 (b) and Uba2 (c) from *Trypanosoma brucei*, *Homo sapiens*, *Drosophila melanogaster*, *Saccharomyces cerevisiae* and *Arabidopsis thaliana*.
